# Supplementary material for: Quantifying the synergistic effect of dispersion state and interfacial adhesion contributions on impact strength of core shell rubber-toughened glassy polymers
Source: Royal Society of Chemistry journal article supplement (doi:10.1039/c5ra23206f), 2015-12-21
Supplement: c5ra23206f1.pdf [file c5ra23206f1.pdf]

## Supporting Information

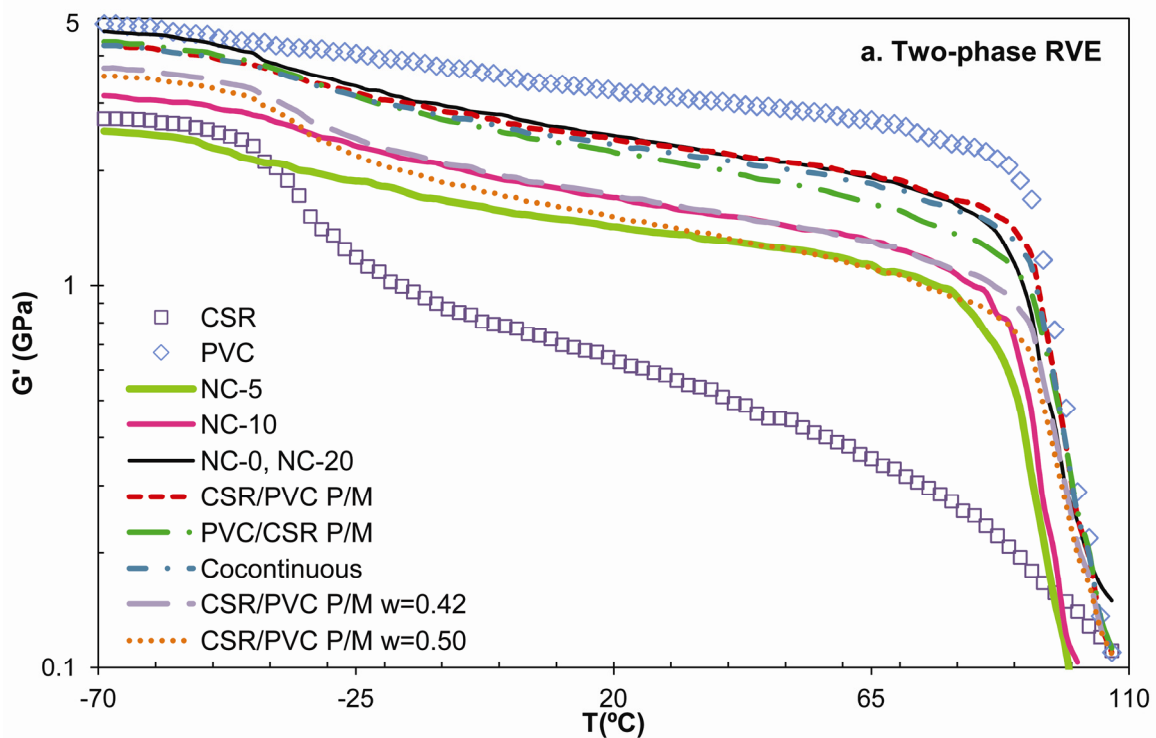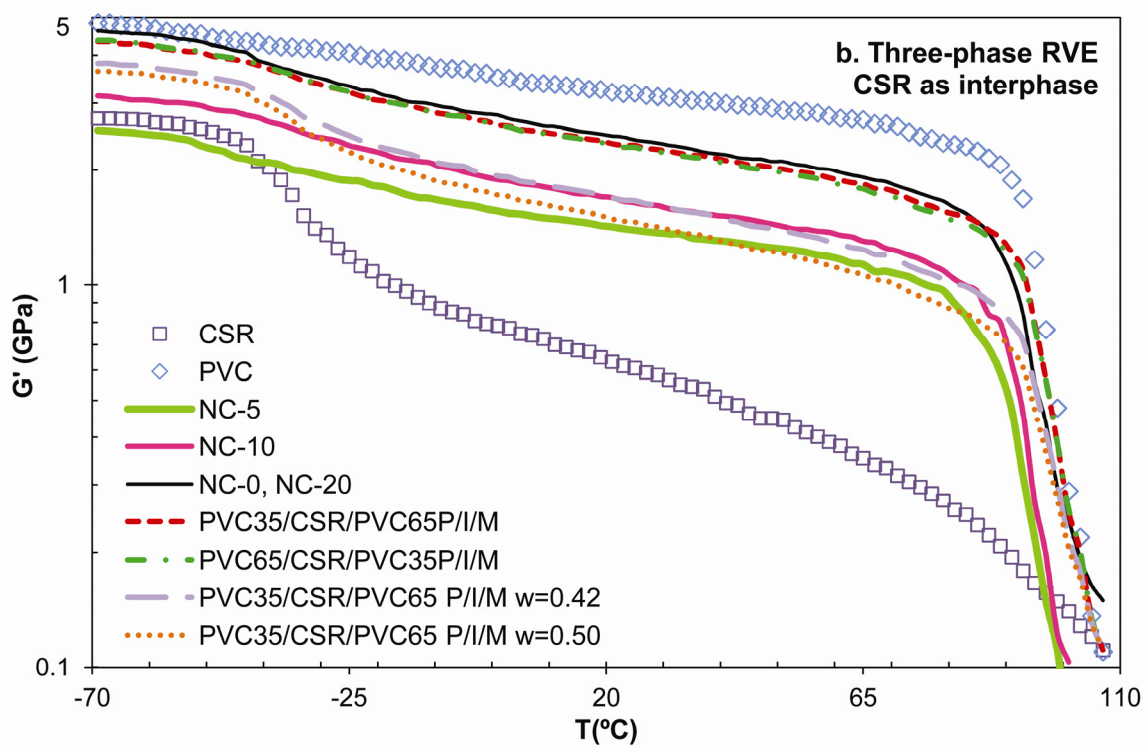

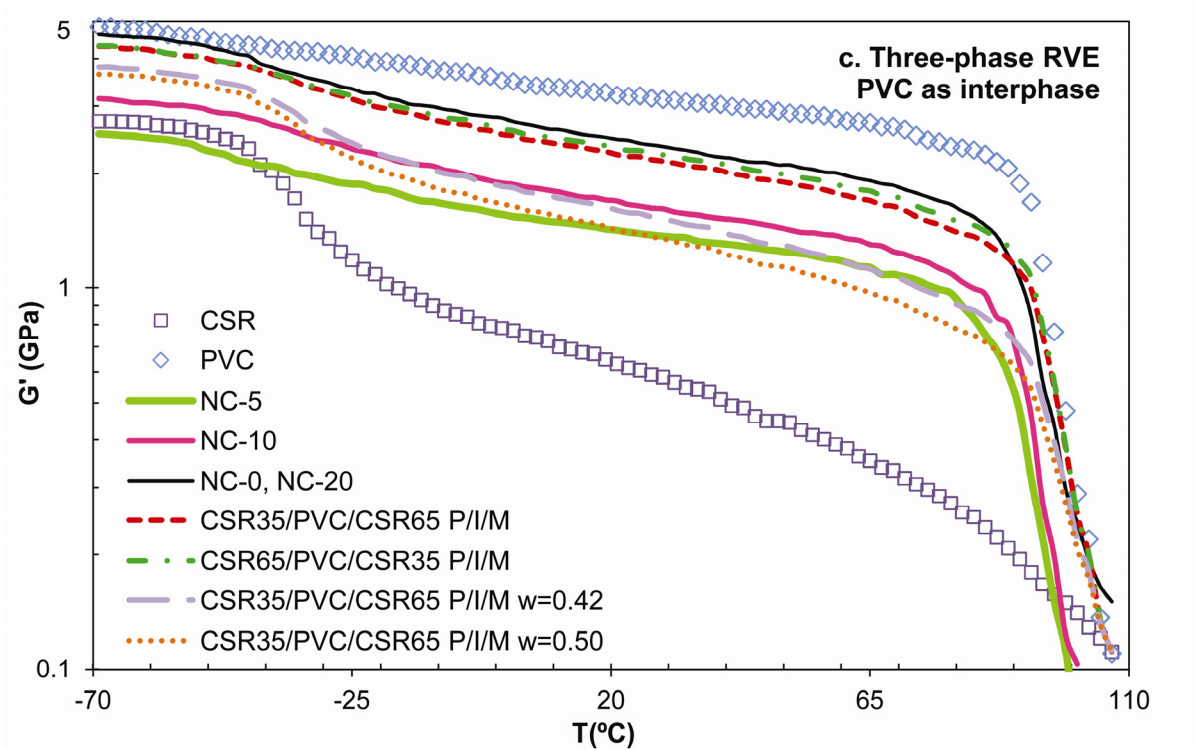

**Fig. S1 Theoretical predictions of the storage modulus ( $G'$ ) for the nanocomposites with different morphologies: Two-phase RVE (a), Three-phase RVE containing CSR (b) and PVC (c) as interphase. Theoretical predictions for nanocomposite containing 50 and 42 wt. % CSR and experimental data of PVC, CSR and different nano-composites are also represented.**
